# Supplementary material for: Circulating Tumor Cell Detection and Capture by Photoacoustic Flow Cytometry in Vivo and ex Vivo
Source: MDPI journal article supplement (doi:10.3390/cancers5041691), 2013-12-10
Supplement: s1 [file s1]

## Supplementary Material

# **Circulating Tumor Cell Detection and Capture by Photoacoustic Flow Cytometry *in Vivo* and *ex Vivo***

**Ekaterina I. Galanzha<sup>1</sup> and Vladimir P. Zharov<sup>1,2,\*</sup>**

### **Correction on page 1691**

The correction concerns the last sentence in the abstract on page 1691:

Further developments include detection of circulating cancer-associated microparticles, and super-resolution PAFC beyond the diffraction and spectral limits.
